# Supplementary material for: Widespread air pollutants of the North China Plain during the Asian summer monsoon season: a case study
Source: Copernicus journal article supplement (doi:10.5194/acp-18-8491-2018), 2018-06-18
Supplement: Supplementary file 1 [file acp-18-8491-2018-supplement.pdf]

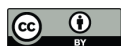

*Supplement of*

**Widespread air pollutants of the North China Plain during the Asian summer monsoon season: a case study**

**Jiarui Wu et al.**

*Correspondence to:* Guohui Li (ligh@ieecas.cn) and Junji Cao (jjcao@ieecas.cn)

The copyright of individual parts of the supplement might differ from the CC BY 4.0 License.

## **1 Supplement**

2 The supplement provides description about the WRF-CHEM model configuration,  
3 methodology, synoptic conditions, model evaluations and the effect of interaction between  
4 NCP and non-NCP emissions during the study episode.

5

## **6 Section S1 WRF-CHEM Model and Configuration**

### **7 S1.1 WRF-CHEM Model**

8 The WRF-CHEM used in this study includes a new flexible gas phase chemical module  
9 and the CMAQ aerosol module developed by US EPA (Li et al., 2010; Binkowski and  
10 Roselle, 2003). In this aerosol component, the particle size distribution is represented as the  
11 superposition of three lognormal sub-distributions, called modes. The processes of  
12 coagulation, particles growth by the addition of mass, and new particle formation are  
13 included. The wet deposition employs the method used in the CMAQ and the surface  
14 deposition of chemical species is parameterized following Wesely (1989). The photolysis  
15 rates are calculated using the FTUV (Li et al., 2005, 2011a, b), considering the effects of  
16 aerosols and clouds on photolysis.

### **17 S1.2 Model Configuration**

18 The physical parameterizations include the microphysics scheme of Hong et al (Hong  
19 and Lim, 2006), the Mellor, Yamada, and Janjic (MYJ) turbulent kinetic energy (TKE)  
20 planetary boundary layer scheme (Janjić, 2002), the Unified Noah land-surface model (Chen  
21 and Dudhia, 2001), the Goddard longwave radiation scheme (Chou and Suarez, 2001) and the  
22 Goddard shortwave parameterization (Chou and Suarez, 1999). The NCEP  $1^{\circ} \times 1^{\circ}$  reanalysis  
23 data are used to obtain the meteorological initial and boundary conditions, and the  
24 meteorology has been nudged in the model simulation. The chemical initial and boundary  
25 conditions are interpolated from the 6h output of MOZART (Horowitz et al., 2003). The

spin-up time of the WRF-CHEM model is 28 hours. The SAPRC-99 (Statewide Air Pollution Research Center, version 1999) chemical mechanism is used in the present study. The anthropogenic emissions are developed by Zhang et al. (2009), including contributions from agriculture, industry, power generation, residential, and transportation sources. The biogenic emissions are calculated online using the MEGAN (Model of Emissions of Gases and Aerosol from Nature) model developed by Guenther et al (2006).

## Section S2 Methodology

### S2.1 Factor Separation Approach

The formation of the secondary atmospheric pollutant, such as O<sub>3</sub>, secondary organic aerosol, and nitrate, is a complicated nonlinear process in which its precursors from various emission sources and transport react chemically or reach equilibrium thermodynamically. Nevertheless, it is not straightforward to evaluate the contributions from different factors in a nonlinear process. The factor separation approach (FSA) proposed by Stein and Alpert (1993) can be used to isolate the effect of one single factor from a nonlinear process and has been widely used to evaluate source effects (Gabusi et al., 2008; Weinroth et al., 2008; Carnevale et al., 2010; Li et al., 2014a; Wu et al., 2017). The total effect of one factor in the presence of others can be decomposed into contributions from the factor and that from the interactions of all those factors.

Suppose that field  $f$  depends on a factor  $\varphi$ :

$$f = f(\varphi)$$

The FSA decomposes function  $f(\varphi)$  into a constant part that does not depend on  $\varphi$  ( $f(0)$ ) and a  $\varphi$ -depending component ( $f'(\varphi)$ ), as follows:

$$f'(0) = f(0)$$

$$f'(\varphi) = f(\varphi) - f(0)$$

Considering that there are two factors  $X$  and  $Y$  that influence the formation of secondary pollutants in the atmosphere and also interact with each other. Denoting  $f_{XY}$ ,  $f_X$ ,  $f_Y$ , and  $f_0$  as the simulations including both of two factors, factor  $X$  only, factor  $Y$  only, and none of the two factors, respectively. The contributions of factor  $X$  and  $Y$  can be isolated as follows:

$$f'_X = f_X - f_0$$

$$f'_Y = f_Y - f_0$$

Note that term  $f'_{X(Y)}$  represents the impacts of factor  $X(Y)$ , while  $f_0$  is the term independent of factors  $X$  and  $Y$ .

The simulation including both factors  $X$  and  $Y$  is given by:

$$f_{XY} = f_0 + f'_X + f'_Y + f'_{XY}$$

The mutual interaction between  $X$  and  $Y$  can be expressed as:

$$f'_{XY} = f_{XY} - f_0 - f'_X - f'_Y = f_{XY} - (f_X - f_0) - (f_Y - f_0) - f_0 = f_{XY} - f_X - f_Y + f_0$$

The above equation shows that the study needs four simulations,  $f_{XY}$ ,  $f_X$ ,  $f_Y$  and  $f_0$ , to evaluate the contributions of two factors and their synergistic interactions.

## S2.2 Statistical metrics for observation-model comparisons

In the present study, the mean bias ( $MB$ ), root mean square error ( $RMSE$ ) and the index of agreement ( $IOA$ ) are used as indicators to evaluate the performance of WRF-CHEM model in simulation against measurements.  $IOA$  describes the relative difference between the model and observation, ranging from 0 to 1, with 1 indicating perfect agreement.

$$MB = \frac{1}{N} \sum_{i=1}^N (P_i - O_i)$$

$$RMSE = \left[ \frac{1}{N} \sum_{i=1}^N (P_i - O_i)^2 \right]^{\frac{1}{2}}$$

$$IOA = 1 - \frac{\sum_{i=1}^N (P_i - O_i)^2}{\sum_{i=1}^N (|P_i - \bar{O}| + |O_i - \bar{O}|)^2}$$

Where  $P_i$  and  $O_i$  are the predicted and observed pollutant concentrations, respectively.  $N$  is

the total number of the predictions used for comparisons, and  $\bar{P}$  and  $\bar{O}$  represents the average of the prediction and observation, respectively.

### **Section S3 Synoptic patterns During the Study Episode**

Figure S3 presents the mean geopotential heights with wind fields at 500 hPa from 23 to 28 May 2015. In May, the main part of the subtropical high at 500 hPa is located in the western Pacific, with its ridgeline moving around the south of China (Chang et al., 2000; Sui et al., 2007; Jiang et al., 2011). On 23 May 2015, a shallow trough was located between 120°E and 130°E, with the west-northwest wind prevailing over the NCP and its surroundings (Figure S3a). On 24 and 25 May 2015, the high-level trough intensified and moved to the east, the NCP was located behind the trough, and prevailing northwest winds dominate over the NCP (Figures S4b-c). From 26 to 28 May 2015, another weak trough was formed in the westerly wind zone and gradually intensified, moving from 120°E to 130°E. In general, during the study episode, the NCP and its surroundings were located behind the trough and northwest and west flows were prevailing across the region.

Figure S4 shows the variations of the daily mean sea level pressure and wind fields from 23 to 28 May 2015. During the study episode, eastern China was influenced by the high pressure whose center was located in the Yellow Sea, which was caused by the high-level trough. With the warm and humid flow induced by the Asian summer monsoon, rainstorms began to occur in the Pearl River Delta and Yangtze River Delta. The air quality in the NCP, NEC, and NWC was barely influenced by the precipitation during the episode. From 23 to 25 May 2015, when the NCP and its surroundings were located behind the high-level trough, most of the NCP and NWC regions were controlled by high pressures centering in the Yellow Sea. The high pressure system was conducive to the accumulation of air pollutants, increasing the  $O_3$  and  $PM_{2.5}$  levels in the NCP. Meanwhile, the low pressure system was

stationed on the north of China. The Liaoning and Jilin provinces were located in the foreshore of the low pressure system, and the prevailing southwest wind facilitated the transport of air pollutants from southwest to northeast. From 26 to 28 May, with the eastward movement of the high-level trough, the surface high pressure weather system began to be stagnant over eastern China, and most of the NCP regions were sandwiched between the high pressure located over the Yellow Sea and the deep low pressure lying in the north-south direction across Inner Mongolia and southern China. The resultant prevailing southeast and southwest winds were favorable for the air pollutants transport from the NCP to the NWC and NEC. In summary, under the effects of the low pressure in the continent and the high pressure over the Yellow Sea, the prevailing southeast or southwest winds over the NCP and its surroundings are expected to transport air pollutants from the NCP to the NEC and NWC.

## **Section S4 Model Evaluation**

### **Section S4.1 Meteorological field simulations**

Considering that the meteorological conditions play an important role in the dispersion or accumulation of air pollutants, simulated meteorological fields are compared to the observations. Figure S6 shows the temporal profiles of the simulated and observed surface temperature in the observation sites in Beijing, Tianjin, Shijiazhuang, Shanghai, and Hefei from 22 to 28 May 2015. The WRF-CHEM model generally reproduces the temporal variation of the temperature during the study episode compared with the observations, with *IOAs* exceeding 0.65, but slightly underestimates the temperature in Shanghai and Hefei, particularly during the noontime, with *MBs* of -1.4 and -1.8 °C, respectively. The overestimation of temperature exists in Beijing, Tianjin, and Shijiazhuang, with *MBs* of 3.3, 1.9, and 3.1 °C, respectively. Figure S7 presents the temporal profiles of the simulated and observed surface wind speed in the observation sites in Beijing, Tianjin, Shijiazhuang,

Shanghai, and Hefei from 22 to 28 May 2015. In general, the model performs reasonably in predicting the temporal variation of the wind speed in these cities, particularly in Tianjin, with *IOA* of 0.64, but the simulated surface wind speed is still biased considerably due to the implication of building distributions and heights and the inability of the model for microscale simulations (Chen et al., 2011; Lee et al., 2011).

#### **Section S4.2 Evaluations of PM<sub>2.5</sub>, O<sub>3</sub> and NO<sub>2</sub> Simulations in Northern China**

The model generally reproduces the variations of PM<sub>2.5</sub>, O<sub>3</sub> and NO<sub>2</sub> concentrations in Northern China, but the model biases still exist. To further evaluate the model performance, Table S1 shows the statistical comparisons of simulated and measured PM<sub>2.5</sub> concentrations of 13 provinces over NCP, NEC and NWC of China. Over the NCP, the model simulations in Hebei, Henan and Shandong are much better than the other provinces, with *IOA*<sub>s</sub> of 0.87, 0.80 and 0.85, respectively. The obvious overestimations of PM<sub>2.5</sub> concentration occur in Beijing, Tianjin and Jiangsu, with *MB* of 10.3 µg m<sup>-3</sup>, 10.7 µg m<sup>-3</sup> and 10.4 µg m<sup>-3</sup>, respectively. The model bias in Beijing is likely attributed to the trans-boundary transport (Wu et al., 2017). The overestimation in Tianjin and Jiangsu might be caused by the marine cloud and the convections, which can not be well resolved in the WRF-CHEM model simulations. The underestimation generally occurs in Anhui province, particular during the last three days, which is perhaps caused by uncertainties of the biomass burning emission. Over the NEC, the PM<sub>2.5</sub> concentrations in the four provinces are generally influenced by the trans-boundary transport from the NCP when southerly winds are prevailing. So the uncertainties of wind field simulations are one of the most important reasons for the model biases in modeling PM<sub>2.5</sub> concentrations in the NEC (Bei et al., 2010, 2016a, b). The model performs well in simulating the PM<sub>2.5</sub> concentration in Shanxi province in the NWC, with *IOA* and *MB* of 0.87 and -1.5 µg m<sup>-3</sup>, respectively, but the overestimation occurs in Shaanxi province, with *IOA* and *MB* of 0.61 and 8.2 µg m<sup>-3</sup>, possibly caused by the uncertainty of wind field simulations

and the emission inventory.

Table S2 shows the statistical comparison of simulated and observed O<sub>3</sub> concentrations of 13 provinces in Northern China. The *IOA<sub>s</sub>* of 7 provinces in the NCP are generally more than 0.90, except the Anhui Province, indicating the good model performance in the NCP, but the model is subject to underestimation, particular in Beijing which is influenced by the trans-boundary transport. The model simulation of O<sub>3</sub> concentrations in the NEC is not as good as that in the NCP, and the underestimation is considerable in Jilin, Liaoning and Inner Mongolia, which is plausibly caused by uncertainties of the trans-boundary transport of air pollutants from the NCP to NEC when the southerly wind is prevailing. The O<sub>3</sub> overestimation generally occurs in the NWC, with the *MB* of 7.5 µg m<sup>-3</sup> and 11.8 µg m<sup>-3</sup> in Shanxi and Shaanxi provinces, respectively. Table S3 provides the statistical comparison of simulated and observed NO<sub>2</sub> concentrations of 13 provinces in Northern China. The model simulations in Tianjin and Liaoning province are not very good in comparison with the other provinces, with the *IOAs* less than 0.50.

In general, the model can reasonably simulate the variation of air pollutants during the study episode, providing the basis to further investigate the effect of trans-boundary transport of the NCP emissions on the air quality in its surrounding provinces.

## **Section S5 Effect of interactions between NCP and non-NCP emissions on the Air Quality in the NCP, NEC and NWC**

Table S4 summarizes the contribution of interactions between NCP and non-NCP emissions to the daily average PM<sub>2.5</sub> concentration in the NCP, NEC and NWC from 22 to 28 May 2015. The interaction between NCP and non-NCP emissions generally increases the PM<sub>2.5</sub> concentration due to the enhancement of precursors of air pollutants and the aerosol radiation feedback. The average contribution of interactions between NCP and non-NCP emissions to the PM<sub>2.5</sub> concentration in the NCP, Jilin, Liaoning, Shanxi, Shaanxi and Inner



176 Mongolia is 3.0, 2.6, 7.9, 1.9, 1.7, and 0.8  $\mu\text{g m}^{-3}$ , or 4.6%, 7.5%, 13.3%, 4.4%, 5.5%, and  
177 5.1%, respectively. The contribution of interactions between NCP and non-NCP emissions on  
178 the daily afternoon average  $\text{O}_3$  concentration in the NCP, NEC and NWC from 22 to 28 May  
179 2015 is summarized in Table S5. On average, the interaction of these two emissions increases  
180 the afternoon  $\text{O}_3$  concentrations by 16.9, 12.8, 17.9, 12.6, 11.1, and 5.8  $\mu\text{g m}^{-3}$ , or 10.5%,  
181 8.7%, 8.2%, 7.6%, 8.5%, and 5.5%, in the NCP, Jilin, Liaoning, Shanxi, Shaanxi and Inner  
182 Mongolia, respectively.  
183  
184

## 185 References

- 186 Bei, N., Lei, W., Zavala, M., and Molina, L. T.: Ozone predictabilities due to meteorological  
 187 uncertainties in the Mexico City basin using ensemble forecasts, *Atmospheric Chemistry*  
 188 *and Physics*, 10, 6295-6309, 10.5194/acp-10-6295-2010, 2010.
- 189 Bei, N. F., Li, G. H., Huang, R. J., Cao, J. J., Meng, N., Feng, T., Liu, S. X., Zhang, T.,  
 190 Zhang, Q., and Molina, L. T.: Typical synoptic situations and their impacts on the  
 191 wintertime air pollution in the Guanzhong basin, China, *Atmospheric Chemistry and*  
 192 *Physics*, 16, 7373-7387, 10.5194/acp-16-7373-2016, 2016a.
- 193 Bei, N. F., Xiao, B., Meng, N., and Feng, T.: Critical role of meteorological conditions in a  
 194 persistent haze episode in the Guanzhong basin, China, *Science of Total Environment*,  
 195 550, 273-284, 10.1016/j.scitotenv.2015.12.159, 2016b.
- 196 Binkowski, F. S. and Roselle, S. J.: Models-3 Community Multiscale Air Quality (CMAQ)  
 197 model aerosol component 1. Model description, *Journal of Geophysical Research*,  
 198 108(D6), 4183-18, doi:10.1029/2001JD001409, 2003.
- 199 Carnevale, C., Pisoni, E., and Volta, M.: A non-linear analysis to detect the origin of PM10  
 200 concentrations in Northern Italy, *Science of Total Environment*, 409, 182-191,  
 201 10.1016/j.scitotenv.2010.09.038, 2010.
- 202 Chang, C. P., Zhang, Y., and Li, T.: Interannual and Interdecadal Variations of the East Asian  
 203 Summer Monsoon and Tropical Pacific SSTs. Part I: Roles of the Subtropical Ridge,  
 204 *Journal of Climate*, 13, 4310-4325, 2000.
- 205 Chen, F., and Dudhia, J.: Coupling an advanced land surface-hydrology model with the Penn  
 206 State-NCAR MM5 modeling system. Part I: Model implementation and sensitivity,  
 207 *Monthly Weather Review*, 129, 569-585,  
 208 10.1175/1520-0493(2001)129<0569:caalsh>2.0.co;2, 2001.
- 209 Chen, F., Kusaka, H., Bornstein, R., Ching, J., Grimmond, C. S. B., Grossman-Clarke, S.,  
 210 Loridan, T., Manning, K. W., Martilli, A., Miao, S., Sailor, D., Salamanca, F. P., Taha,  
 211 H., Tewari, M., Wang, X., Wyszogrodzki, A. A., and Zhang, C.: The integrated  
 212 WRF/urban modelling system: development, evaluation, and applications to urban  
 213 environmental problems, *International Journal Climatology*, 31, 273-288,  
 214 doi:10.1002/joc.2158, 2011.
- 215 Chou, M. D., and Suarez, M. J.: A solar radiation parameterization for atmospheric studies,  
 216 NASA TM-104606, Nasa Tech.memo, 15, 1999.
- 217 Chou, M. D., Suarez, M. J., Liang, X. Z., Yan, M. H., and Cote, C.: A Thermal Infrared  
 218 Radiation Parameterization for Atmospheric Studies, Max J, 2001.
- 219 Gabusi, V., Pisoni, E., and Volta, M.: Factor separation in air quality simulations, *Ecological*  
 220 *Modelling*, 218, 383-392, 10.1016/j.ecolmodel.2008.07.030, 2008.
- 221 Guenther, A., Karl, T., Harley, P., Wiedinmyer, C., Palmer, P. I., and Geron, C.: Estimates of  
 222 global terrestrial isoprene emissions using MEGAN (Model of Emissions of Gases and  
 223 Aerosols from Nature), *Atmospheric Chemistry and Physics*, 6, 3181-3210, 2006.
- 224 Hong, S.-Y., and Lim, J.-O. J.: The WRF Single-Moment 6-Class Microphysics Scheme  
 225 (WSM6), *Asia-Pacific Journal of Atmospheric Sciences*, 42, 129-151, 2006.
- 226 Horowitz, L. W., Walters, S., Mauzerall, D. L., Emmons, L. K., Rasch, P. J., Granier, C., Tie,

227 X. X., Lamarque, J. F., Schultz, M. G., Tyndall, G. S., Orlando, J. J., and Brasseur, G. P.:  
 228 A global simulation of tropospheric ozone and related tracers: Description and  
 229 evaluation of MOZART, version 2, *Journal of Geophysical Research-Atmospheres*, 108,  
 230 29, 10.1029/2002jd002853, 2003.

231 Janjić, Z. I.: Nonsingular Implementation of the Mellor–Yamada Level 2.5 Scheme in the  
 232 NCEP Meso Model, Ncep Office Note, 436, 2002.

233 Jiang, X. W., Li, Y. Q., Yang, S., and Wu, R. G.: Interannual and interdecadal variations of  
 234 the South Asian and western Pacific subtropical highs and their relationships with  
 235 Asian-Pacific summer climate, *Meteorology and Atmospheric Physics*, 113, 171-180,  
 236 10.1007/s00703-011-0146-8, 2011.

237 Lee, S.-H., Kim, S.-W., Angevine, W. M., Bianco, L., McKeen, S. A., Senff, C. J., Trainer,  
 238 M., Tucker, S. C., and Zamora, R. J.: Evaluation of urban surface parameterizations in  
 239 the WRF model using measurements during the Texas Air Quality Study 2006 field  
 240 campaign, *Atmospheric Chemistry and Physics*, 11, 2127–2143,  
 241 doi:10.5194/acp-11-2127-2011, 2011.

242 Li, G. H., Zhang, R. Y., Fan, J. W., and Tie, X. X.: Impacts of black carbon aerosol on  
 243 photolysis and ozone, *Journal of Geophysical Research-Atmospheres*, 110, 10,  
 244 10.1029/2005jd005898, 2005.

245 Li, G., Lei, W., Zavala, M., Volkamer, R., Dusanter, S., Stevens, P., and Molina, L. T.:  
 246 Impacts of HONO sources on the photochemistry in Mexico City during the  
 247 MCMA-2006/MILAGO Campaign, *Atmospheric Chemistry and Physics*, 10, 6551-6567,  
 248 10.5194/acp-10-6551-2010, 2010.

249 Li, G., Bei, N., Tie, X., and Molina, L. T.: Aerosol effects on the photochemistry in Mexico  
 250 City during MCMA-2006/MILAGRO campaign, *Atmospheric Chemistry and Physics*,  
 251 11, 5169-5182, 10.5194/acp-11-5169-2011, 2011a.

252 Li, G., Zavala, M., Lei, W., Tsimpidi, A. P., Karydis, V. A., Pandis, S. N., agaratna, M. R.,  
 253 and Molina, L. T.: Simulations of organic aerosol concentrations in Mexico City using  
 254 the WRF-CHEM model during the MCMA-2006/MILAGRO campaign, *Atmospheric  
 255 Chemistry and Physics*, 11, 3789-3809, 10.5194/acp-11-3789-2011, 2011b.

256 Li, G. H., Bei, N. F., Zavala, M., and Molina, L. T.: Ozone formation along the California  
 257 Mexican border region during Cal-Mex 2010 field campaign, *Atmospheric Environment*,  
 258 48, 370-389, 10.1016/j.atmosenv.2013.11.067, 2014a.

259 Stein, U., and Alpert, P.: Factor separation in numerical simulations, *Journal of the  
 260 Atmospheric Science*, 50, 2107-2115, 10.1175/1520-0469(1993)  
 261 050<2107:fsins>2.0.co;2, 1993.

262 Sui, C. H., Chung, P. H., and Li, T.: Interannual and interdecadal variability of the  
 263 summertime western North Pacific subtropical high, *Geophysical Research Letters*, 34,  
 264 6, 10.1029/2006gl029204, 2007.

265 Weinhold, B.: Ozone nation - EPA standard panned by the people, *Environmental Health  
 266 Perspectives*, 116, A302-A305, 2008.

267 Wesely, M. L.: Parameterization of surface resistances to gaseous dry deposition in  
 268 regional-scale numerical models, *Atmospheric Environment*, 23, 1293-1304,  
 269 10.1016/0004-6981(89)90153-4, 1989.

270 Wu, J., Li, G., Cao, J., Bei, N., Wang, Y., Feng, T., Huang, R., Liu, S., Zhang, Q., and Tie, X.:  
271 Contributions of trans-boundary transport to summertime air quality in Beijing, China,  
272 Atmospheric Chemistry and Physics, 17, 1-46, 2017.

273 Zhang, Q., Streets, D. G., Carmichael, G. R., He, K. B., Huo, H., Kannari, A., Klimont, Z.,  
274 Park, I. S., Reddy, S., Fu, J. S., Chen, D., Duan, L., Lei, Y., Wang, L. T., and Yao, Z. L.:  
275 Asian emissions in 2006 for the NASA INTEX-B mission, Atmospheric Chemistry and  
276 Physics, 9, 5131-5153, 2009.

277

278

Table S1. Statistical comparison of simulated and measured PM<sub>2.5</sub> concentrations in the NCP, NEC and NWC.

| Region  | Province       | <i>MB</i> (μg m <sup>-3</sup> ) | <i>RMSE</i> (μg m <sup>-3</sup> ) | <i>IOA</i> |
|---------|----------------|---------------------------------|-----------------------------------|------------|
| NCP     | Beijing        | 10.3                            | 30.5                              | 0.71       |
|         | Tianjin        | 10.7                            | 33.3                              | 0.52       |
|         | Hebei          | 7.5                             | 14.4                              | 0.87       |
|         | Shandong       | -1.7                            | 11.7                              | 0.85       |
|         | Henan          | 2.3                             | 21.5                              | 0.80       |
|         | Jiangsu        | 10.4                            | 18.9                              | 0.44       |
|         | Anhui          | -6.3                            | 22.8                              | 0.43       |
| NEC     | Liaoning       | -1.5                            | 12.6                              | 0.67       |
|         | Jilin          | -0.8                            | 12.3                              | 0.58       |
| NWC     | Shanxi         | -1.5                            | 14.8                              | 0.87       |
|         | Shaanxi        | 8.2                             | 14.6                              | 0.61       |
| NEC+NWC | Inner Mongolia | -11.5                           | 15.4                              | 0.60       |

Table S2. Statistical comparison of simulated and measured O<sub>3</sub> concentrations in the NCP, NEC and NWC.

| Region  | Province       | <i>MB</i> (μg m <sup>-3</sup> ) | <i>RMSE</i> (μg m <sup>-3</sup> ) | <i>IOA</i> |
|---------|----------------|---------------------------------|-----------------------------------|------------|
| NCP     | Beijing        | -18.6                           | 46.0                              | 0.90       |
|         | Tianjin        | -13.6                           | 33.3                              | 0.90       |
|         | Hebei          | -8.8                            | 19.5                              | 0.96       |
|         | Shandong       | -14.4                           | 22.5                              | 0.94       |
|         | Henan          | 7.9                             | 23.8                              | 0.94       |
|         | Jiangsu        | 1.3                             | 20.6                              | 0.95       |
|         | Anhui          | -6.3                            | 22.8                              | 0.84       |
| NEC     | Liaoning       | -25.4                           | 32.8                              | 0.84       |
|         | Jilin          | -23.2                           | 34.8                              | 0.83       |
| NWC     | Shanxi         | 7.5                             | 21.3                              | 0.94       |
|         | Shaanxi        | 11.8                            | 23.3                              | 0.89       |
| NEC+NWC | Inner Mongolia | -13.7                           | 19.3                              | 0.92       |

Table S3. Statistical comparison of simulated and measured NO<sub>2</sub> concentrations in the NCP, NEC and NWC.

| Region  | Province       | <i>MB</i> (μg m <sup>-3</sup> ) | <i>RMSE</i> (μg m <sup>-3</sup> ) | <i>IOA</i> |
|---------|----------------|---------------------------------|-----------------------------------|------------|
| NCP     | Beijing        | 5.0                             | 17.7                              | 0.66       |
|         | Tianjin        | 2.1                             | 20.4                              | 0.31       |
|         | Hebei          | 0.7                             | 12.3                              | 0.67       |
|         | Shandong       | -0.5                            | 12.3                              | 0.71       |
|         | Henan          | 4.2                             | 13.0                              | 0.74       |
|         | Jiangsu        | 2.7                             | 10.3                              | 0.59       |
|         | Anhui          | 0.4                             | 11.2                              | 0.56       |
| NEC     | Liaoning       | -0.8                            | 12.7                              | 0.45       |
|         | Jilin          | 3.3                             | 12.2                              | 0.68       |
| NWC     | Shanxi         | 1.7                             | 11.5                              | 0.79       |
|         | Shaanxi        | 4.7                             | 11.1                              | 0.75       |
| NEC+NWC | Inner Mongolia | 1.1                             | 7.6                               | 0.88       |

299 Table S4. Daily average PM<sub>2.5</sub> contributions (µg m<sup>-3</sup>) in the NEC, NWC and NCP due to the  
300 interaction between NCP and non-NCP emissions from 22 to 28 May 2015.  
301

| Date                          | NCP  | Jilin | Liaoning | Shanxi | Shaanxi | Inner Mongolia |
|-------------------------------|------|-------|----------|--------|---------|----------------|
| 22                            | 0.02 | 0.4   | 1.4      | 0.07   | 0.02    | 0.06           |
| 23                            | 1.3  | 2.4   | 4.8      | 1.7    | 0.2     | 0.4            |
| 24                            | 2.1  | 3.0   | 5.6      | 3.4    | 0.9     | 0.6            |
| 25                            | 3.2  | 3.3   | 8.1      | 3.0    | 1.2     | 1.0            |
| 26                            | 5.0  | 1.1   | 8.1      | 1.6    | 1.9     | 0.8            |
| 27                            | 4.9  | 1.3   | 15.6     | 1.9    | 3.3     | 0.7            |
| 28                            | 4.7  | 6.4   | 11.5     | 1.8    | 4.7     | 2.1            |
| Average (µg m <sup>-3</sup> ) | 3.0  | 2.6   | 7.9      | 1.9    | 1.7     | 0.8            |
| Average (%)                   | 4.6  | 7.5   | 13.3     | 4.4    | 5.5     | 5.1            |

302

303

304



Table S5. Daily afternoon (12:00-18:00 BJT) average O<sub>3</sub> contributions (μg m<sup>-3</sup>) in the NEC, NWC and NCP due to the interaction between NCP and non-NCP emissions from 22 to 28 May 2015.

| Date                          | NCP  | Jilin | Liaoning | Shanxi | Shaanxi | Inner Mongolia |
|-------------------------------|------|-------|----------|--------|---------|----------------|
| 22                            | 12.8 | 11.6  | 13.8     | 11.6   | 7.3     | 2.8            |
| 23                            | 21.5 | 16.0  | 20.1     | 18.2   | 12.2    | 4.6            |
| 24                            | 19.6 | 18.3  | 21.5     | 16.2   | 13.7    | 7.2            |
| 25                            | 20.7 | 19.4  | 19.4     | 14.2   | 11.7    | 8.2            |
| 26                            | 11.1 | 10.6  | 14.9     | 7.0    | 10.5    | 7.3            |
| 27                            | 15.6 | 3.2   | 17.0     | 11.1   | 13.4    | 5.4            |
| 28                            | 17.1 | 10.8  | 18.9     | 9.8    | 9.1     | 5.2            |
| Average (μg m <sup>-3</sup> ) | 16.9 | 12.8  | 17.9     | 12.6   | 11.1    | 5.8            |
| Average (%)                   | 10.5 | 8.7   | 8.2      | 7.6    | 8.5     | 5.5            |

311  
312  
  
313  
314  
315  
316  
317  
318  
  
319  
320  
  
321  
  
322  
  
323  
324  
  
325  
326  
327  
  
328  
329  
330  
  
331  
  
332  
333  
334  
335

## Supplement Figure Captions

- Figure S1 Defined three sections in Northern China. 1) Northeast China (NEC): Heilongjiang, Jilin, Liaoning, and the east part of Inner Mongolia; 2) Northwest China (NWC): Shanxi, Shaanxi, and the west part of Inner Mongolia; 3) North China Plain (NCP): Beijing, Tianjin, Hebei, Shandong, Henan, and the north part of Jiangsu and Anhui. The red circle marked with number 1 to 5 denotes the meteorological site in Beijing, Tianjin, Shijiazhuang, Shanghai, and Hefei, respectively.
- Figure S2 Spatial distribution of anthropogenic emission rates of (a) NO<sub>x</sub>, (b) VOC<sub>s</sub>, (c) OC, and (d) SO<sub>2</sub> (10<sup>6</sup> g month<sup>-1</sup>) in Mainland China.
- Figure S3 Geopotential heights and wind vectors at 500 hPa from 23 to 28 May 2015.
- Figure S4 The mean sea level pressure and wind vectors from 23 to 28 May 2015.
- Figure S5 Variation of East Asian summer monsoon index from 1988 to 2017 (Climate Diagnostics and Prediction Division/NCC/CMA).
- Figure S6 Comparison of measured (black dots) and predicted (blue line) diurnal profiles of near-surface hourly temperature in Beijing, Jinan, Wuhan, Shanghai, and Zhengzhou from 22 to 28 May 2015.
- Figure S7 Comparison of measured (black dots) and predicted (blue line) diurnal profiles of near-surface hourly wind speed in Beijing, Jinan, Wuhan, Shanghai, and Zhengzhou from 22 to 28 May 2015.

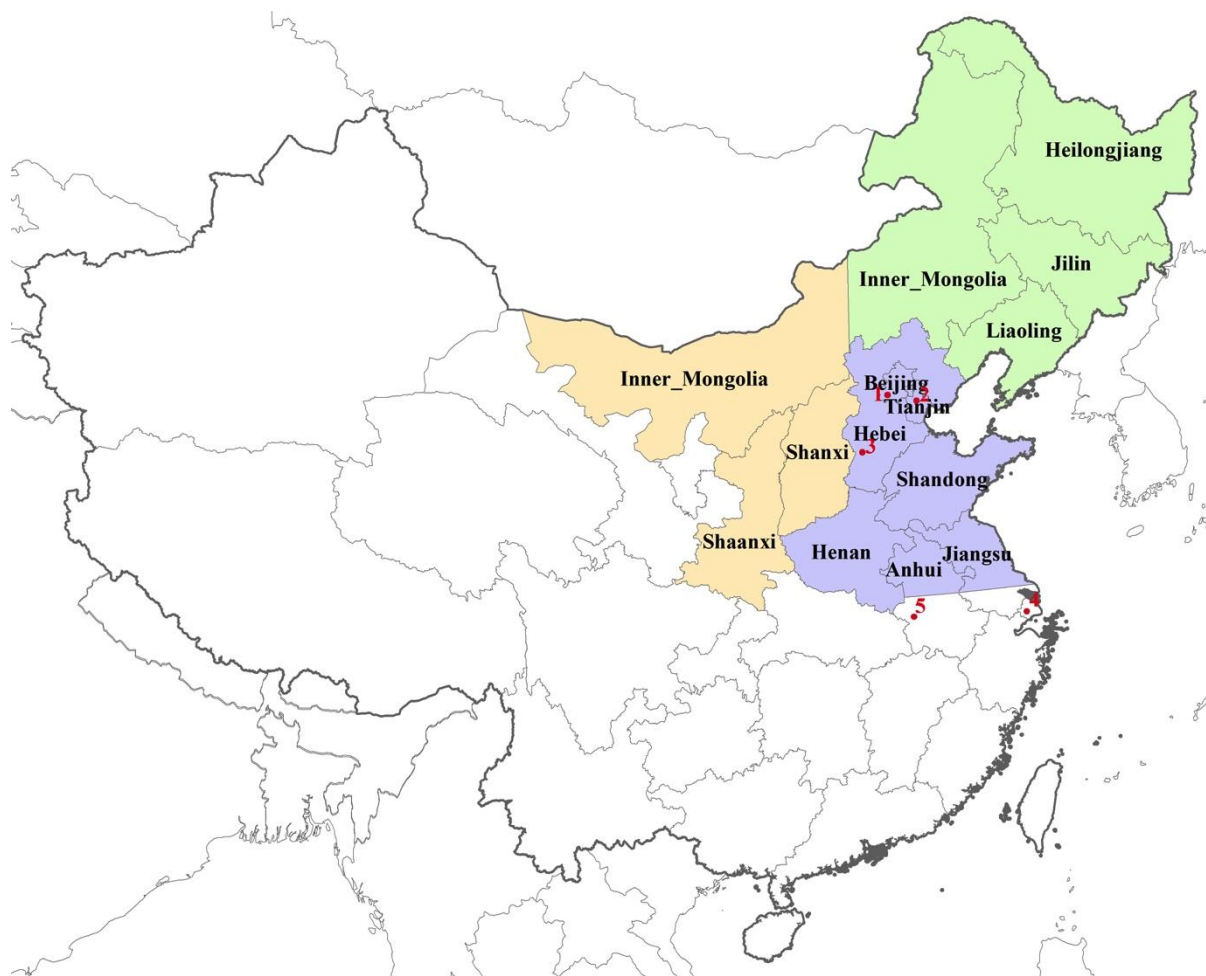

Figure S1 Defined three sections in Northern China. 1) Northeast China (NEC): Heilongjiang, Jilin, Liaoning, and the east part of Inner Mongolia; 2) Northwest China (NWC): Shanxi, Shaanxi, and the west part of Inner Mongolia; 3) North China Plain (NCP): Beijing, Tianjin, Hebei, Shandong, Henan, and the north part of Jiangsu and Anhui. The red circle marked with number 1 to 5 denotes the meteorological site in Beijing, Tianjin, Shijiazhuang, Shanghai, and Hefei, respectively.

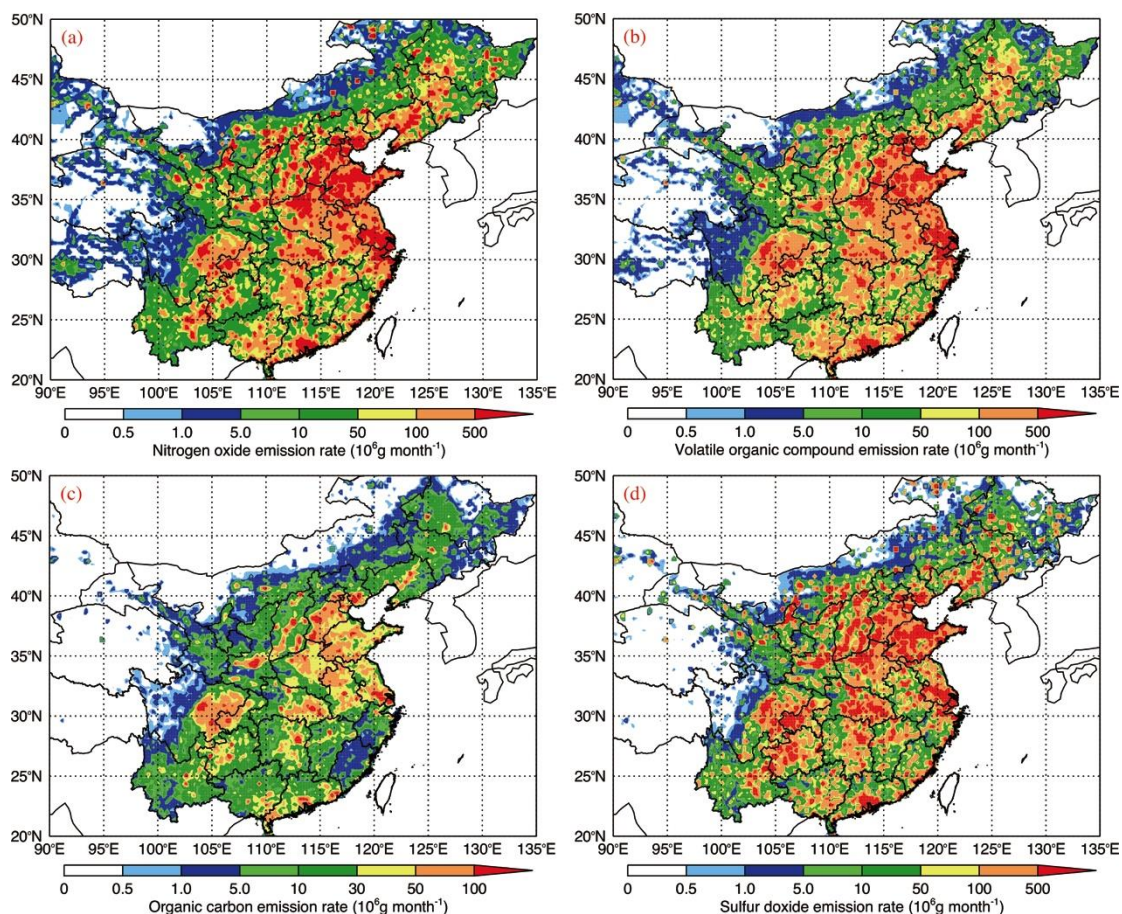

Figure S2 Spatial distribution of anthropogenic emission rates of (a) NO<sub>x</sub>, (b) VOC<sub>s</sub>, (c) OC, and (d) SO<sub>2</sub> (10<sup>6</sup> g month<sup>-1</sup>) in Mainland China.



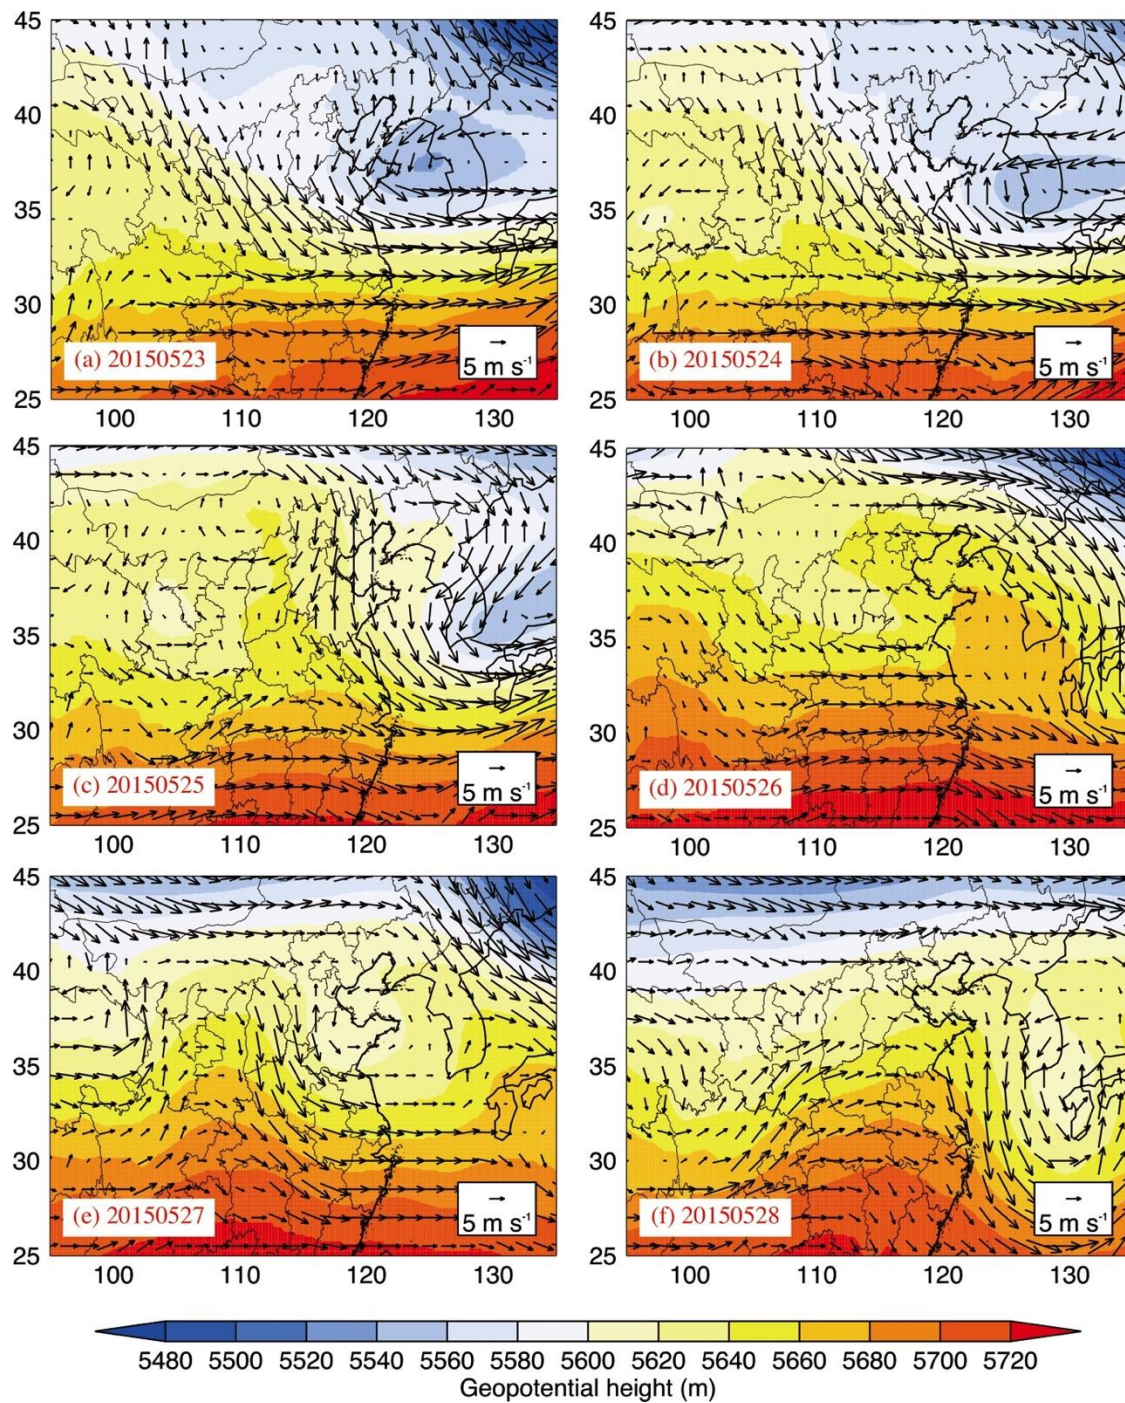

Figure S3 Geopotential heights and wind vectors at 500 hPa from 23 to 28 May 2015.



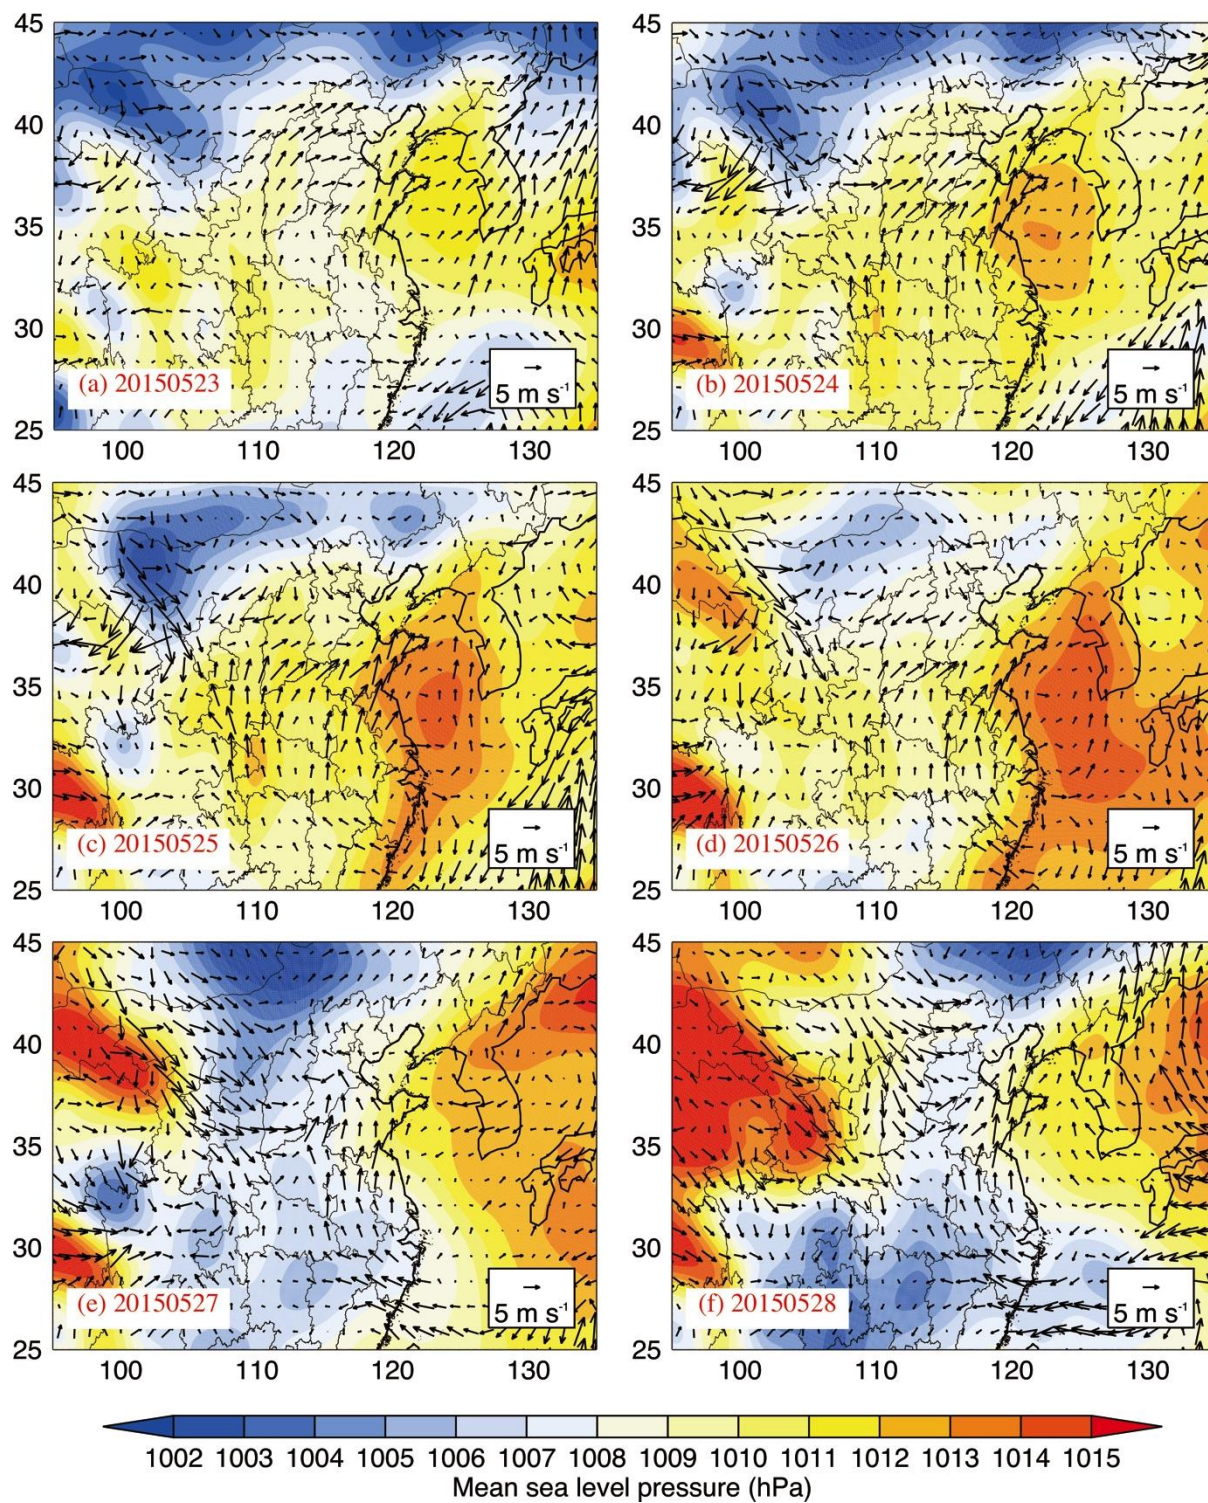

Figure S4 The mean sea level pressure and wind vectors from 23 to 28 May 2015.

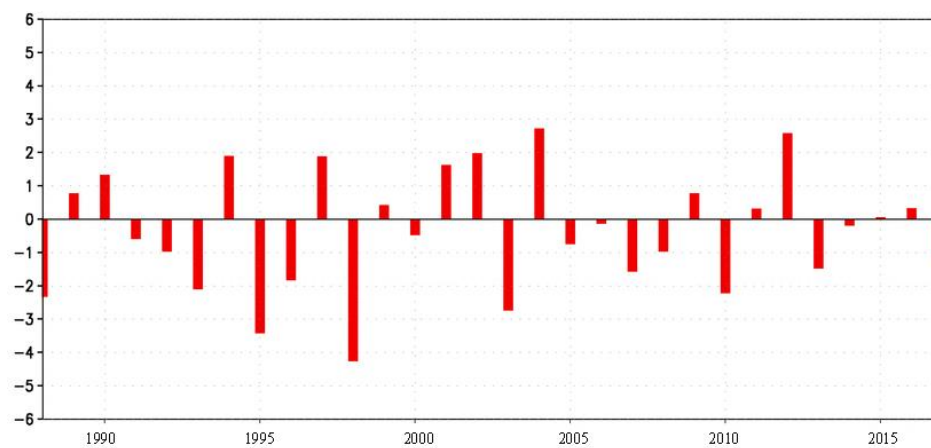

Figure S5 Variation of East Asian summer monsoon index from 1988 to 2017 (Climate Diagnostics and Prediction Division/National Climate Center/China Meteorological Administration).



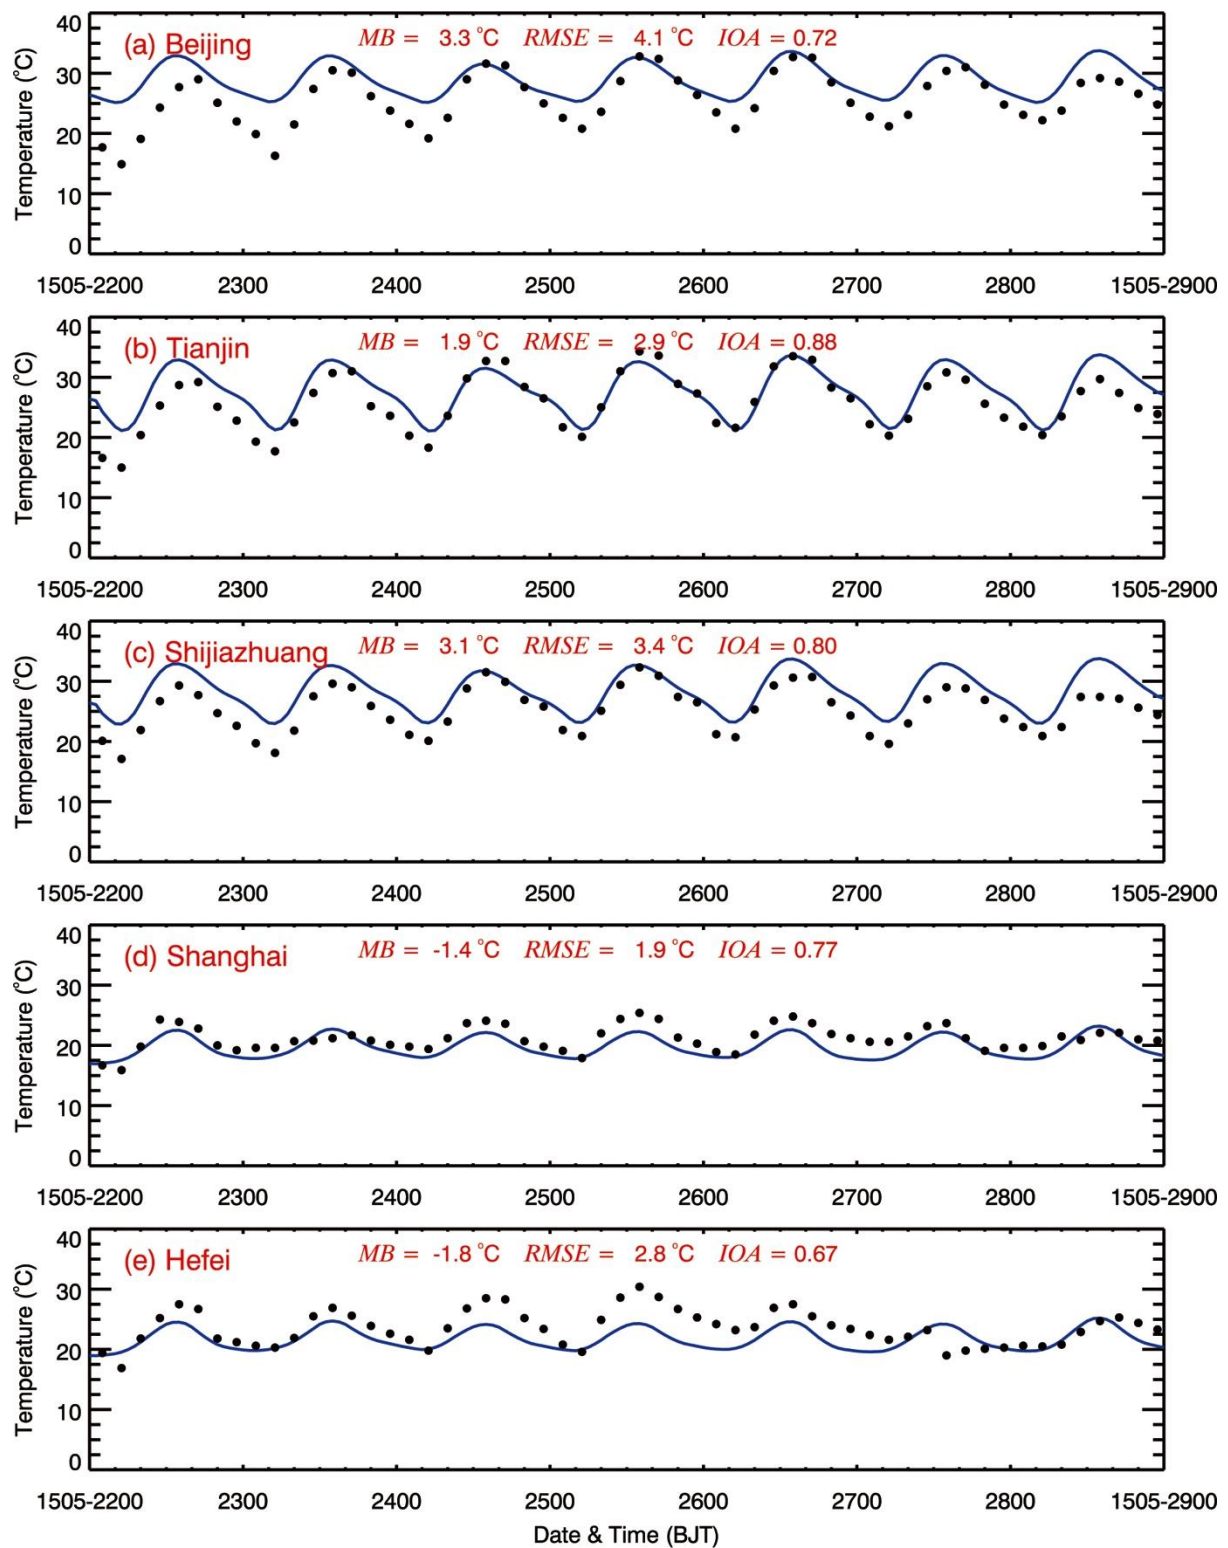

Figure S6 Comparison of measured (black dots) and predicted (blue line) diurnal profiles of near-surface hourly temperature in Beijing, Tianjin, Shijiazhuang, Shanghai, and Hefei from 22 to 28 May 2015.



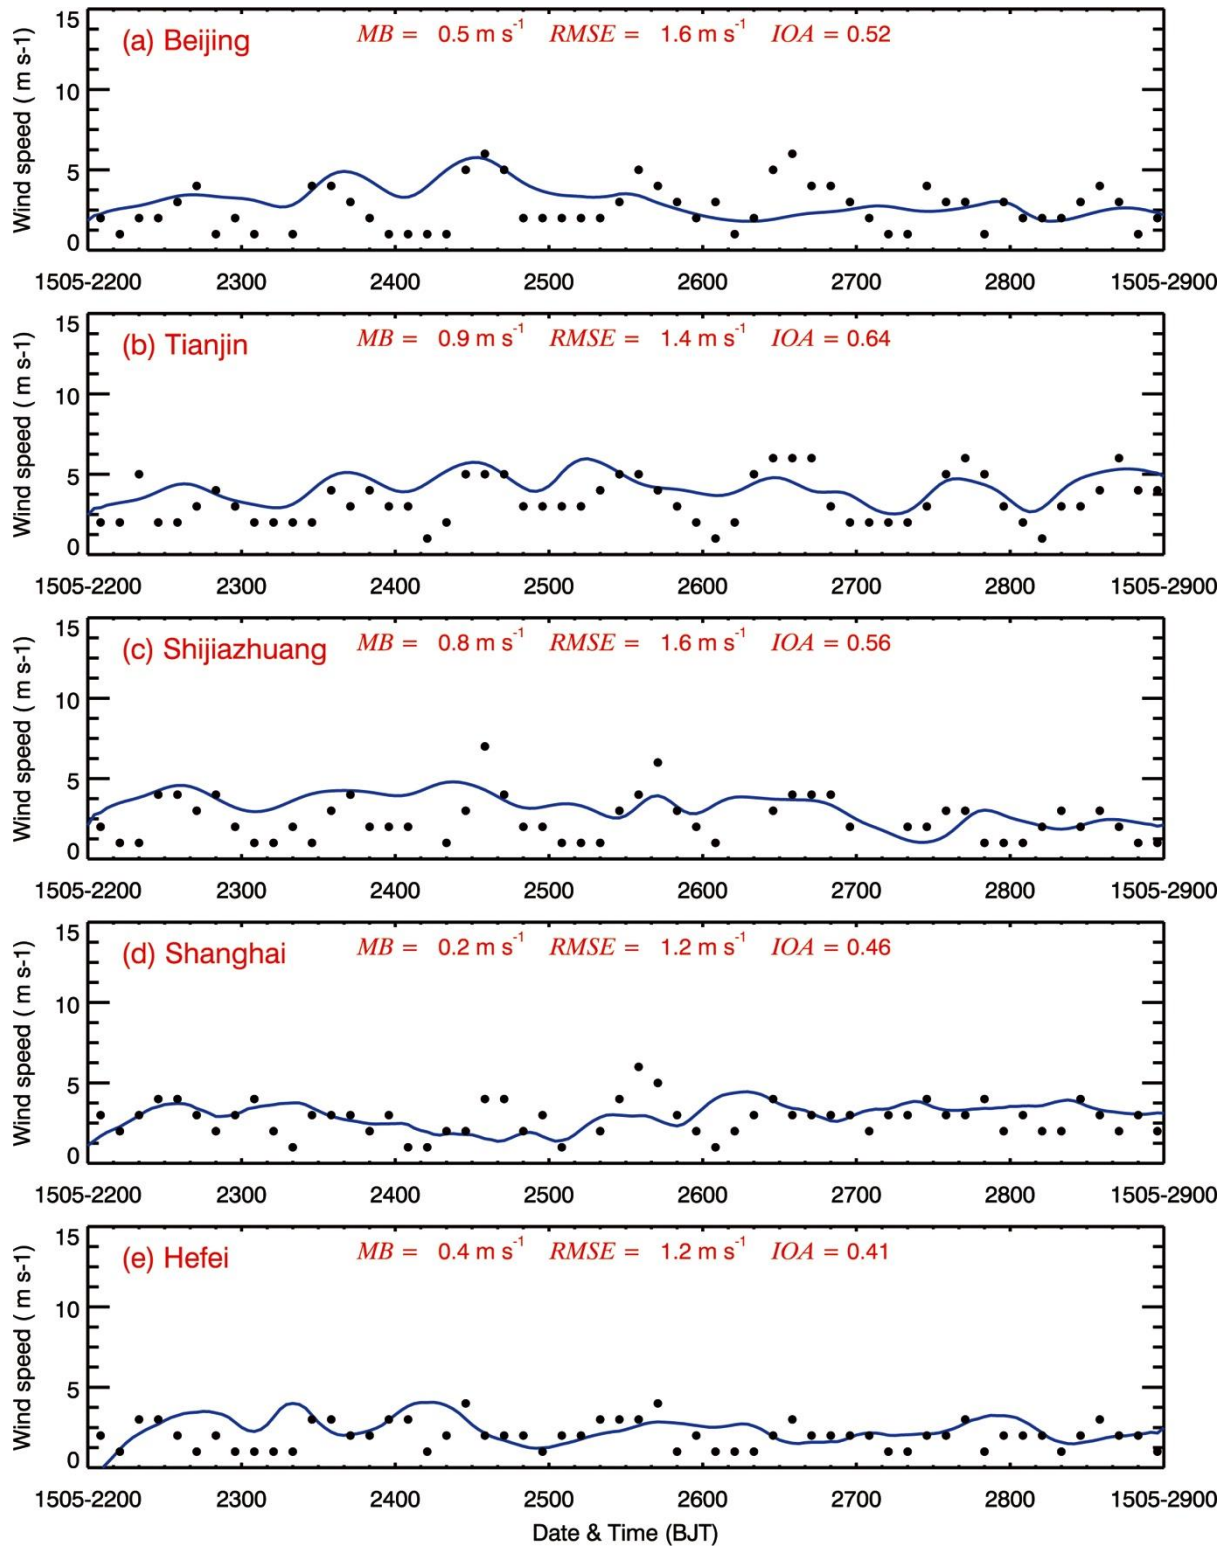

Figure S7 Comparison of measured (black dots) and predicted (blue line) diurnal profiles of near-surface hourly wind speed in Beijing, Tianjin, Shijiazhuang, Shanghai, and Hefei from 22 to 28 May 2015.
